# Supplementary material for: Copper light-catching electrodes for organic photovoltaics
Source: Royal Society of Chemistry journal article supplement (doi:10.1039/c7se00077d), 2017-01-01
Supplement: c7se00077d1.pdf [file c7se00077d1.pdf]

## Copper light-catching electrodes for organic photovoltaics

H. Jessica Pereira<sup>1</sup>, Oliver S. Hutter<sup>1,2</sup>, G Dinesha M R Dabera<sup>1</sup>, Luke Rochford<sup>1,3</sup> and Ross. A. Hatton<sup>1\*</sup>

### Supplementary Information

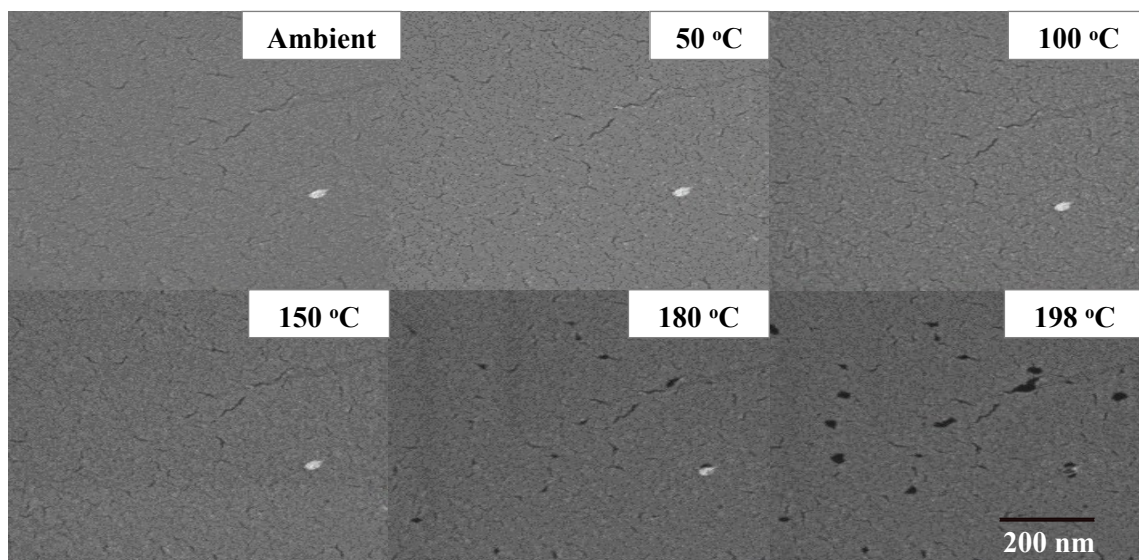

**Figure S1:** SEM images of 11 nm thick Cu film on PET upon annealing from 50 °C to 198 °C using an SEM with a built-in heating stage.

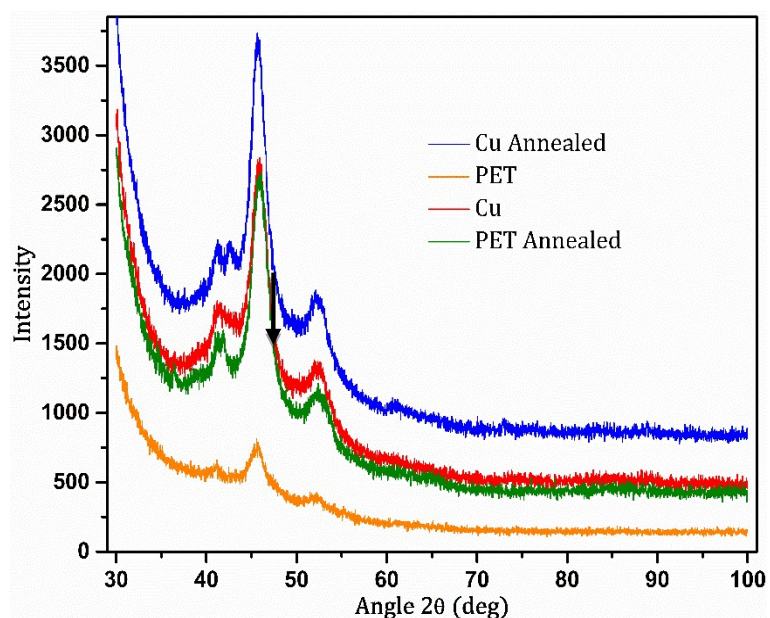

**Figure S2:** XRD pattern of Cu films (11 nm) deposited on PET substrates before and after annealing at 175°C for 10 min in vacuum. The pattern corresponding to the annealed Cu film has been offset for clarity.

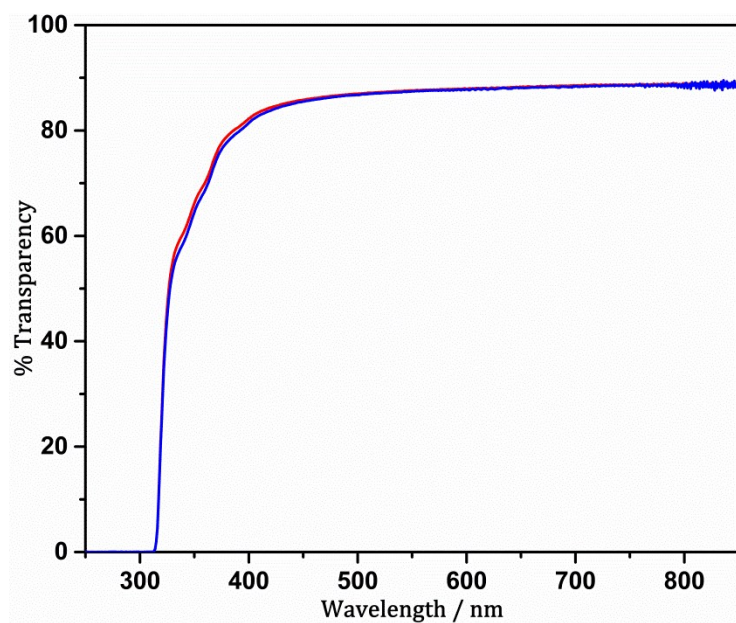

**Figure S3:** Far-field optical transparency of PET substrates before (red) and after (blue) annealing at 175°C for 10 min in high vacuum.
